# Supplementary material for: Whole blood RNA signatures in tuberculosis patients receiving H56:IC31 vaccine as adjunctive therapy
Source: PubMed Central journal article supplement (PMC10904528; doi:10.3389/fimmu.2024.1350593), 2024-02-16

## SUPPLEMENTAL INFORMATION

### **Whole blood RNA signatures in Tuberculosis patients receiving H56:IC31 vaccine as adjunctive therapy**

Noelia Alonso-Rodríguez<sup>1</sup>, Eleonora Vianello<sup>2</sup>, Suzanne van Veen<sup>2</sup>, Synne Jenum<sup>1</sup>, Kristian Tonby<sup>1,3</sup>, Rosalie van Riessen<sup>2</sup>, Xiaoran Lai<sup>4</sup>, Rasmus Mortensen<sup>5</sup>, Tom H M Ottenhoff<sup>2</sup>, Anne Ma Dyrhol-Riise<sup>1,3</sup>

<sup>1</sup>Department of Infectious Diseases, Oslo University Hospital, Oslo, Norway.

<sup>2</sup>Department of Infectious Diseases, Leiden University Medical Center, Leiden, The Netherlands.

<sup>3</sup>Institute of Clinical Medicine, University of Oslo, Oslo, Norway.

<sup>4</sup>Oslo Centre for Biostatistics and Epidemiology, Faculty of Medicine, University of Oslo, Oslo, Norway

<sup>5</sup>Dept. of Infectious Disease Immunology, Statens Serum Institut, Copenhagen, Denmark.

## **Table of Contents**

**Table 1.-** List of the genes and corresponding modules included in the analysis.

**Table 2.-** List of primers and probes used in the high-throughput qPCR platform Biomark HD system (Standard BioTools).

**Table 3.-** H56:IC31 vaccine mediated responses.

**Figure 1.-** Post-vaccination gene expression differences in A) H56:IC31 group compared to Controls; and, B) vaccine Responders compared to Controls.

**Figure 2.-** Principal Component Analysis of the expression of the 183 pre-selected genes in H56:IC31 vaccinated patients at all time points.

**Figure 3.-** Heatmap and clustering analysis of the H56:IC31 group based on the expression of preselected genes.

**Figure 4.-** Evolution of the ACS-COR signature within the H56:IC31 group and Control group.



**Table 2.- List of primers and probes used in the high-throughput qPCR platform Biomark HD system (Standard BioTools).**

| Gene        | Assay         |
|-------------|---------------|
| ABR         | Hs01077828_m1 |
| AIRE        | Hs00230829_m1 |
| ANKRD22     | Hs00944018_m1 |
| APOL1       | Hs01066280_m1 |
| AREG        | Hs00950669_m1 |
| ASAP1       | Hs00987469_m1 |
| B2M         | Hs00187842_m1 |
| BATF2       | Hs00912737_m1 |
| BCL2        | Hs00608023_m1 |
| BMP6        | Hs01099594_m1 |
| BPI         | Hs01552756_m1 |
| C1QA        | Hs00381122_m1 |
| C1QB        | Hs00608019_m1 |
| C1QC        | Hs00757779_m1 |
| C2          | Hs00918862_m1 |
| CAMTA1      | Hs01051596_m1 |
| CASP8       | Hs01018151_m1 |
| CCL11       | Hs00237013_m1 |
| CCL13       | Hs00234646_m1 |
| CCL19       | Hs00171149_m1 |
| CCL2        | Hs00234140_m1 |
| CCL22       | Hs01574247_m1 |
| CCL23       | Hs00207056_m1 |
| CCL3        | Hs00234142_m1 |
| CCL4        | Hs99999148_m1 |
| CCL5        | Hs00982282_m1 |
| CCR7        | Hs01013469_m1 |
| CD14        | Hs00169122_g1 |
| CD163       | Hs00174705_m1 |
| CD19        | Hs99999192_m1 |
| CD209       | Hs01588349_m1 |
| CD27        | Hs00386811_m1 |
| CD274       | Hs00204257_m1 |
| CD38        | Hs01120071_m1 |
| CD3E        | Hs01062241_m1 |
| CD4         | Hs01058407_m1 |
| CD79A       | Hs00998119_m1 |
| CD79B       | Hs00236881_m1 |
| CD8A        | Hs00233520_m1 |
| CLECTA      | Hs00224028_m1 |
| CR2         | Hs00153398_m1 |
| CTLA4       | Hs00175480_m1 |
| CX3CL1      | Hs00171086_m1 |
| CXCL10      | Hs00171042_m1 |
| CXCL13      | Hs00757930_m1 |
| CXCL8       | Hs00174103_m1 |
| CXCL9       | Hs00171065_m1 |
| CXCR5       | Hs00173527_m1 |
| DSE         | Hs00203441_m1 |
| EGF         | Hs01099990_m1 |
| ETV7        | Hs00903229_m1 |
| FASLG       | Hs00899442_m1 |
| FCGR1A/B/CP | Hs00174081_m1 |
| FCGR3A      | Hs04188274_m1 |
| FLCN        | Hs00376065_m1 |
| FOXP3       | Hs01085834_m1 |
| FPR1        | Hs00181830_m1 |
| GAPDH_g1    | Hs02786624_g1 |
| GAPDH_m1    | Hs99999905_m1 |
| GATA3       | Hs00231122_m1 |
| GBP1        | Hs00977005_m1 |
| GBP2        | Hs00894837_m1 |
| GBP4        | Hs00925073_m1 |
| GBP5        | Hs00369472_m1 |
| GNLY        | Hs01120727_m1 |
| GUSB        | Hs00930627_m1 |
| GZMA        | Hs00989184_m1 |
| GZMB        | Hs00188051_m1 |
| HCK         | Hs01067403_m1 |
| HPRT1       | Hs02800695_m1 |
| ICAM1       | Hs00164932_m1 |
| IDO1        | Hs00984148_m1 |
| IFI16       | Hs00986757_m1 |
| IFI35       | Hs00413458_m1 |
| IFI44       | Hs00197427_m1 |
| IFI44L      | Hs00915292_m1 |
| IFI6        | Hs00242571_m1 |
| IFIH1       | Hs00223420_m1 |
| IFIT2       | Hs00533665_m1 |
| IFIT3       | Hs00155468_m1 |
| IFIT5       | Hs00202721_m1 |
| IFITM1      | Hs01652522_g1 |
| IFITM3      | Hs03057129_s1 |
| IFNG        | Hs00989291_m1 |
| IGHD        | Hs00378878_m1 |
| IL10        | Hs00961622_m1 |
| IL12A       | Hs01073447_m1 |
| IL12B       | Hs01011518_m1 |
| IL13        | Hs00174379_m1 |
| IL15        | Hs01003716_m1 |
| IL17A       | Hs00174383_m1 |
| IL1B        | Hs01555410_m1 |
| IL2         | Hs00174114_m1 |
| IL22RA1     | Hs00222035_m1 |
| IL23A       | Hs00372324_m1 |

| Gene     | Assay         |
|----------|---------------|
| IL2RA    | Hs00907777_m1 |
| IL4      | Hs00174122_m1 |
| IL5      | Hs99999031_m1 |
| IL5RA    | Hs00602482_m1 |
| IL6      | Hs00174131_m1 |
| IL7R     | Hs00902334_m1 |
| IL9      | Hs00174125_m1 |
| IRAK3    | Hs00936103_m1 |
| IRF7     | Hs00185375_m1 |
| KIF1B    | Hs01114511_m1 |
| KLRB1    | Hs00174469_m1 |
| KLRC1    | Hs00242628_m1 |
| KLRC2/3  | Hs04192492_gH |
| KLRD1    | Hs00233844_m1 |
| LAG3     | Hs99999160_m1 |
| LTf      | Hs00914334_m1 |
| LYN      | Hs01015816_m1 |
| MAP4K4   | Hs01101394_m1 |
| MAP7D3   | Hs00226257_m1 |
| MARCO    | Hs00198937_m1 |
| MMP9     | Hs00957562_m1 |
| MRC1     | Hs00267207_m1 |
| MRC2     | Hs00195862_m1 |
| MS4A1    | Hs00544819_m1 |
| NCAM1    | Hs00941830_m1 |
| NEDD4L   | Hs00969321_m1 |
| NLRCA    | Hs00892666_m1 |
| NLRP1    | Hs00248187_m1 |
| NLRP10   | Hs00738590_m1 |
| NLRP11   | Hs00935472_m1 |
| NLRP12   | Hs00376283_m2 |
| NLRP13   | Hs00603406_m1 |
| NLRP2    | Hs01546932_m1 |
| NLRP3    | Hs00918082_m1 |
| NLRP4    | Hs00370499_m1 |
| NLRP6    | Hs00373246_m1 |
| NLRP7    | Hs00373683_m1 |
| NOD1     | Hs01036720_m1 |
| NOD2     | Hs01550753_m1 |
| OAS1     | Hs00973635_m1 |
| OAS2     | Hs00942643_m1 |
| OAS3     | Hs00196324_m1 |
| PAX5     | Hs00277134_m1 |
| PRF1     | Hs00169473_m2 |
| PTPRCv1  | Hs04266413_m1 |
| PTPRCv2  | Hs00898488_m1 |
| RAB13    | Hs04400188_g1 |
| RAB24    | Hs01557556_g1 |
| RAB33A   | Hs00191243_m1 |
| RORC     | Hs01076112_m1 |
| SCARF1   | Hs01092477_m1 |
| SDR39U1  | Hs00220190_m1 |
| SEC14L1  | Hs01019672_m1 |
| SEPTIN4  | Hs00365352_m1 |
| SERPING1 | Hs00163781_m1 |
| SLAMF7   | Hs00904275_m1 |
| SMARCD3  | Hs00162003_m1 |
| SOCS1    | Hs00864158_g1 |
| SPP1     | Hs00959010_m1 |
| STAT1    | Hs01013996_m1 |
| STAT2    | Hs01013132_m1 |
| STT3A    | Hs00537619_m1 |
| TAGAP    | Hs00299284_m1 |
| TAP1     | Hs00388675_m1 |
| TAP2     | Hs00241060_m1 |
| TBC1D7   | Hs00964082_m1 |
| TBX21    | Hs00894392_m1 |
| TGFB1    | Hs00998133_m1 |
| TGFBR2   | Hs00234253_m1 |
| TIFA     | Hs00385268_m1 |
| TIMP2    | Hs00234278_m1 |
| TLR1     | Hs00413978_m1 |
| TLR10    | Hs01675179_m1 |
| TLR2     | Hs00152932_m1 |
| TLR3     | Hs00152933_m1 |
| TLR4     | Hs00152939_m1 |
| TLR5     | Hs00152825_m1 |
| TLR6     | Hs04975839_m1 |
| TLR7     | Hs00152971_m1 |
| TLR8     | Hs00152972_m1 |
| TLR9     | Hs00152973_m1 |
| TNF      | Hs00174128_m1 |
| TNFRSF1A | Hs01042313_m1 |
| TNFRSF1B | Hs00961750_m1 |
| TNIP1    | Hs00374581_m1 |
| TNRSF18  | Hs00188346_m1 |
| TRAFD1   | Hs00198630_m1 |
| TRMT2A   | Hs00224133_m1 |
| TUBGCP6  | Hs01077299_m1 |
| TWIST1   | Hs00361186_m1 |
| UCP2     | Hs01075227_m1 |
| VEGFA    | Hs00900055_m1 |
| ZNF274   | Hs00249453_m1 |
| ZNF331   | Hs00367929_m1 |
| ZNF532   | Hs00539543_m1 |

**Color Legend**

- MLPA genes already published
- Extra genes selected from scientific reviews
- Extra control
- Extra B and NK cell makers
- Reference genes

**Assays A**

| Plate1 | 1       | 2     | 3      | 4         | 5      | 6       |
|--------|---------|-------|--------|-----------|--------|---------|
| A      | ABR     | CASP8 | CD274  | DSE       | GNLY   | IFIT5   |
| B      | BCL2    | CCL4  | CR2    | FPR1      | IFI16  | IL13    |
| C      | AIRE    | CCL11 | CD38   | EGF       | GUSB   | IFITM1  |
| D      | BMP6    | CCL5  | CTLA4  | GAPDH_g1  | IFI35  | IL15    |
| E      | ANKRD22 | CCL13 | CD3E   | ETV7      | GZMA   | IFITM3  |
| F      | BPI     | CCR7  | CX3CL1 | GAPDH_m1  | IFI44  | IL17A   |
| G      | APOL1   | CCL19 | CD4    | FASLG     | GZMB   | IFNG    |
| H      | C1QA    | CD14  | CXCL10 | GATA3     | IFI44L | IL1B    |
| I      | AREG    | CCL2  | CD79A  | FCGR1A/B/ | HCK    | IGHD    |
| J      | C1QB    | CD163 | CXCL13 | GBP1      | IFI6   | IL2     |
| K      | ASAP1   | CCL22 | CD79B  | FCGR3A    | HPRT1  | IL10    |
| L      | C1QC    | CD19  | CXCL8  | GBP2      | IFIH1  | IL22RA1 |
| M      | B2M     | CCL23 | CD8A   | FLCN      | ICAM1  | IL12A   |
| N      | C2      | CD209 | CXCL9  | GBP4      | IFIT2  | IL23A   |
| O      | BATF2   | CCL3  | CLEC7A | FOXP3     | IDO1   | IL12B   |
| P      | CAMTA1  | CD27  | CXCR5  | GBP5      | IFIT3  | IL2RA   |

**Assays B**

| Plate2 | 1       | 2      | 3       | 4        | 5      | 6        |
|--------|---------|--------|---------|----------|--------|----------|
| A      | IL4     | MAP4K4 | NLRP3   | RORC     | TBC1D7 | TNF      |
| B      | KIF1B   | NEDD4L | OAS3    | SOCS1    | TLR2   | TWIST1   |
| C      | IL5     | MAP7D3 | NLRP4   | SCARF1   | TBX21  | TNFRSF1A |
| D      | KLRB1   | NLRCA  | PAX5    | SPP1     | TLR3   | UCP2     |
| E      | IL5RA   | MARCO  | NLRP6   | SDR39U1  | TGFB1  | TNFRSF1B |
| F      | KLRC1   | NLRP1  | PRF1    | STAT1    | TLR4   | VEGFA    |
| G      | IL6     | MMP9   | NLRP7   | SEC14L1  | TGFBR2 | TNIP1    |
| H      | KLRC2/3 | NLRP10 | PTPRCv1 | STAT2    | TLR5   | ZNF274   |
| I      | IL7R    | MRC1   | NOD1    | SEPTIN4  | TIFA   | TNRSF18  |
| J      | KLRD1   | NLRP11 | PTPRCv2 | STT3A    | TLR6   | ZNF331   |
| K      | IL9     | MRC2   | NOD2    | SERPING1 | TIMP2  | TRAFD1   |
| L      | LAG3    | NLRP12 | RAB13   | TAGAP    | TLR7   | ZNF532   |
| M      | IRAK3   | MS4A1  | OAS1    | SLAMF7   | TLR1   | TRMT2A   |
| N      | LTf     | NLRP13 | RAB24   | TAP1     | TLR8   | GAPDH_g1 |
| O      | IRF7    | NCAM1  | OAS2    | SMARCD3  | TLR10  | TUBGCP6  |
| P      | LYN     | NLRP2  | RAB33A  | TAP2     | TLR9   | GAPDH_m1 |

**Table 3.- H56:IC31 vaccine mediated responses.** Table shows the individual Cytokine+ CD4+ T cell responses and anti-H56 IgG titers in the H56:IC31 and Control groups at days 84, 98, 140 and 154 and the ratio of responses at day 98 vs day 84, and day 154 vs day 84. CD4+ T cell responses are represented in Spots Forming Units (SFU) per 300,000 cells. Humoral responses are defined by log transformed anti-H56 IgG serum levels (EU/ml). Patients who showed a  $\geq 2$ -fold increase in CD4+ T cell responses are highlighted in red. Patients who showed a 2-fold increase in humoral responses are highlighted in green. Responders (R); Partial Responders (PR), and Non-Responders (NR) are specified in the table.

|                                              |               | VACCINE |        |        |        |        |        |        |        |        |        |        | CONTROL |        |        |        |        |        |        |
|----------------------------------------------|---------------|---------|--------|--------|--------|--------|--------|--------|--------|--------|--------|--------|---------|--------|--------|--------|--------|--------|--------|
|                                              |               | R       | R      | R      | R      | PR     | PR     | PR     | NR     | R      | R      | R      | 01-004  | 01-008 | 01-021 | 01-027 | 01-030 | 01-035 | 01-040 |
| IMMUNOGENICITY                               |               | 01-003  | 01-005 | 01-011 | 01-015 | 01-019 | 01-022 | 01-023 | 01-025 | 01-029 | 01-032 | 02-002 |         |        |        |        |        |        |        |
| Cytokine+ CD4+ T cell<br>(SFU/300.000 cells) | D84           | 22.33   | 206.67 | 35.00  | 290.00 | 65.33  | 26.67  | 289.67 | 75.00  | 157.33 | 99.00  | 139.67 | 271.00  | 33.33  | 36.33  | 154.00 | 88.00  | 10.00  | 7.00   |
|                                              | D98           | 166.00  | 770.33 | 361.00 | 550.00 | 329.67 | 43.33  | 139.67 | 128.33 | 638.67 | 552.67 | 544.00 | 250.33  | 31.33  | 36.33  | 185.67 | 80.67  | 8.67   | 8.67   |
|                                              | D140          |         | 316.67 | 88.67  | 26.67  | 147.00 | 36.67  | 106.00 | 83.67  | 275.33 | 460.33 | 355.67 | 277.67  | 17.00  | 34.00  | 105.67 | 67.33  | 7.00   | 11.67  |
|                                              | D154          | 227     | 727.67 | 117.67 | 661    | 321.67 | 77.67  | 247.67 | 88.33  | 628.67 | 620.33 | 303.33 | 295.67  | 22.67  | 26.67  | 116.33 | 52.67  | 17.00  | 10.67  |
|                                              | RATIO D98/D84 | 7.43    | 3.73   | 10.31  | 1.90   | 5.05   | 1.62   | 0.48   | 1.71   | 4.06   | 5.58   | 3.89   | 0.92    | 0.94   | 1.00   | 1.21   | 0.92   | 0.87   | 1.24   |
| RATIO D154/D84                               | 10.17         | 3.52    | 3.36   | 2.28   | 4.92   | 2.91   | 0.86   | 1.18   | 4.00   | 6.27   | 2.17   | 1.09   | 0.68    | 0.73   | 0.76   | 0.60   | 1.70   | 1.52   |        |
| anti-H56 IgG (log EU/ml)                     | D84           | 0.59    | 1.17   | 0.18   | 0.53   | 0.24   | 0.29   | 0.34   | 0.19   | 3.45   | 0.16   | 0.2    | 0.35    | 0.3    | 0.28   | 0.29   | 0.18   | 0.58   | 0.19   |
|                                              | D98           | 0.8     | 2.98   | 0.32   | 3.1    | 0.32   | 0.25   | 0.6    | 0.16   | 2.36   |        | 0.29   | 0.37    | 0.37   | 0.34   | 0.18   | 0.16   | 0.53   | 0.17   |
|                                              | D140          | 0.96    | 3.19   | 0.2    | 3.23   | 0.2    | 0.31   | 0.32   | 0.16   | 1.86   | 0.41   | 0.53   | 0.41    | 0.38   | 0.28   | 0.64   | 0.47   | 0.58   | 0.24   |
|                                              | D154          | 1.86    | 50.7   | 2.92   | 7.13   | 0.4    | 0.3    | 14.75  | 0.2    | 8.03   | 0.34   | 0.76   | 0.61    | 0.59   | 0.35   | 0.28   | 0.41   | 0.55   | 0.32   |
|                                              | RATIO D98/D84 | 1.36    | 2.55   | 1.78   | 5.85   | 1.33   | 0.86   | 1.76   | 0.84   | 0.68   |        | 1.45   | 1.06    | 1.23   | 1.21   | 0.62   | 0.89   | 0.91   | 0.89   |
| RATIO D154/D84                               | 3.15          | 43.33   | 16.22  | 13.45  | 1.67   | 1.03   | 43.38  | 1.05   | 2.33   | 2.13   | 3.80   | 1.74   | 1.97    | 1.25   | 0.97   | 2.28   | 0.95   | 1.68   |        |

**Figure 1. Post-vaccination gene expression differences in A) H56:IC31 group compared to Controls; and, B) vaccine Responders compared to Controls.**

Selection of genes with Log2 Fold Changes > 0.6 or < -0.6 and/or p-values lower than 0.05 (\*), <0,01 (\*\*), and <0,001 (\*\*\*). Listed genes are grouped by modules at all timepoints post-vaccination (Day 98 – Day 238). A gradient of colour was applied to visualize downregulated (blue) versus upregulated (red) genes in H56:IC31 vaccinated patients compared to Controls.

**A)**

| Module                                  | Gene        | D98      | D140    | D154    | D182     | D238    |
|-----------------------------------------|-------------|----------|---------|---------|----------|---------|
| Apoptosis / survival                    | TNFRSF1A    | 0.925 *  | 0.722   |         |          |         |
|                                         | BCL2        |          |         | 0.704   |          | 0.969   |
|                                         | FASLG       |          |         | 0.744   |          |         |
| B cell markers                          | CD27        | -0.700   |         |         | -0.797   | 1.117   |
|                                         | IGHD        | -0.618   |         |         |          |         |
|                                         | MSA11       | 0.638    |         |         |          | 0.657   |
|                                         | CXCR5       | -0.617   |         |         |          |         |
| Cell activation                         | SLAMF7      |          | 0.632   | 0.676   |          |         |
|                                         | VEGFA       | 0.711 ** |         |         |          |         |
| Cell growth / proliferation             | TGFB2       | 0.733    |         |         |          |         |
|                                         | AREG        | 1.037    | 0.624   | 0.939   | 0.791    |         |
|                                         | CCL23       | 1.251    | 2.001   | 1.554   | 1.868 *  | 0.746   |
| Chemokines                              | CCL19       |          |         | 0.601   | 11.033 * |         |
|                                         | CX3CL1      |          |         |         | -10.015  | 8.280   |
|                                         | C1QB        |          | 0.764   |         |          |         |
| Complement                              | C1QA        |          | 0.910   |         |          |         |
|                                         | C1QC        |          |         |         | 0.753    |         |
|                                         | C2          |          |         |         |          | -0.624  |
| Cytoskeleton associated gene            | SEPT14      | 0.352 *  |         |         |          |         |
|                                         | TUBGCP6     |          | 0.618   |         |          |         |
| Cytotoxicity markers                    | GZMA        | 1.919    | 0.835   | 0.821   | 1.097    | 1.176   |
|                                         | GZMB        |          | 1.338   | 0.817   |          |         |
|                                         | GNLY        |          |         |         |          | 0.845   |
| E3 ubiquitin protein ligases            | NEDD4L      | 1.080 ** | 1.329   |         | 0.758    |         |
|                                         | IFI44       | 0.888 ** |         | 0.350 * |          | -1.104  |
|                                         | IFIH1       | 0.365 *  |         |         |          |         |
| IFN signaling genes                     | STAT1       | 0.464 *  |         |         |          |         |
|                                         | GBP1        | 0.558 *  |         |         |          | -0.724  |
|                                         | TAP1        | 0.592 *  |         |         |          |         |
|                                         | TRAFD1      | 0.605 ** |         |         |          |         |
|                                         | IRF7        | 1.480 ** |         |         | 1.031    | 0.943   |
|                                         | IFIT2       | 0.603    |         |         | 0.622    |         |
|                                         | FCGR1A_B_CP | 0.622    |         |         |          |         |
|                                         | IFIT3       | 0.640    |         |         |          |         |
|                                         | OAS3        | 0.746    | 0.611   |         | 0.413 *  | -1.315  |
|                                         | IDO1        | 0.863    | 1.343   |         | 1.210    | -0.618  |
|                                         | ANKRD22     | 1.262    |         |         |          | -1.837  |
|                                         | SOC1        | 18.768   | 12.371  | 10.132  | 9.226    | -19.904 |
|                                         | GBP4        |          |         |         | -1.411   | -1.989  |
|                                         | IFI6        |          |         |         | -1.068   | -1.249  |
|                                         | IFI44L      |          |         |         | 0.789 *  | -1.249  |
| IFI5                                    |             |          |         | 0.374 * |          |         |
| OAS1                                    |             |          |         | -1.113  |          |         |
| IFITM3                                  |             |          |         | -1.082  |          |         |
| CD274                                   |             |          |         | -0.709  |          |         |
| STAT2                                   |             |          |         | -0.652  |          |         |
| SERPINC1                                |             |          |         | -1.021  | 0.674    | 0.733   |
| Inflammasome components                 | NLRP11      | -19.096  | -11.491 | -17.905 | 18.460   | 9.521   |
|                                         | NLRP4       | -2.72    | -2.364  |         | -0.776   | 9.276   |
|                                         | NLRP4       | 0.666 *  |         |         |          |         |
|                                         | NLRP2       | 1.020    | 1.115   | 1.093   | 0.846    |         |
|                                         | NLRP12      | 0.723    |         |         |          |         |
|                                         | NLRP7       |          | 1.104   |         | 1.083    | 1.012   |
| Inflammation                            | IRAK3       | 0.487 *  |         |         |          |         |
|                                         | SP1         | 0.656    |         |         |          |         |
|                                         | MMP9        | 0.794    |         |         |          |         |
| Metabolism                              | ST3A        | 0.428 ** |         |         |          |         |
|                                         | IL12B       | -11.634  | 18.645  | -1.614  | -0.823   |         |
| Myeloid associated genes                | CXCL13      | 0.736    |         |         |          | -0.846  |
|                                         | CCL3        |          | 0.663   |         | 0.944    |         |
|                                         | CCL22       |          | 1.087   |         |          | -1.333  |
|                                         | CCL2        |          |         | 1.551   | 0.978    |         |
|                                         | FP1         |          |         |         | -0.662   |         |
| NK cell markers                         | KLRF1       | 0.778 *  | 0.910   |         | 0.649    |         |
|                                         | KLRK1       | 0.974 ** | 1.140   | 0.948   | 1.269    |         |
|                                         | FCGR3A      | 0.610    |         | 0.794   | 0.953    | 1.018   |
|                                         | KLRD1       | 0.806    |         | 0.663   | 0.664    | 0.720   |
|                                         | NCAM1       | 0.876    |         |         |          |         |
|                                         | KLRK2_3     |          |         |         | -0.849   | -1.197  |
| Pattern recognition receptors           | TLR8        | 0.716 *  |         |         |          |         |
|                                         | TLR1        | 0.786 *  |         |         |          | 0.663   |
|                                         | TLR3        | 1.246 *  | 1.103   | 0.891   |          |         |
|                                         | TLR4        | 0.777    |         |         |          | -0.830  |
|                                         | TLR2        | 0.863    |         |         |          | -0.778  |
|                                         | MIR1        | 1.249    | 0.697   |         |          | -0.621  |
|                                         | TLR6        | 1.553    |         |         |          | 0.609   |
|                                         | MRC2        |          | 0.646   |         |          |         |
| CD209                                   |             | 0.715    |         |         | -1.180   |         |
| TLR9                                    |             |          |         | -0.644  |          |         |
| NOD2                                    |             |          |         |         | -1.198   |         |
| CLEC7A                                  |             |          |         |         | -0.682   |         |
| Prostanoids                             | ILSRA       | 1.863 ** | 0.884   | 1.489   | 1.431    |         |
|                                         | MARCO       | 0.677    |         |         |          |         |
| Scavenger receptors                     | RAB24       | 0.466 *  |         |         |          |         |
|                                         | RAB13       | 0.598 *  | 0.516 * |         |          |         |
|                                         | RAB33A      | 0.559 ** |         |         |          |         |
|                                         | TBC1D7      | 1.543 ** |         |         |          |         |
| Small GTPases / (rho) GTPase            | AIRE        | -0.667   |         | 0.916   |          | 0.645   |
|                                         | PPIRCV2     | 0.425 *  |         |         |          |         |
|                                         | CCR7        |          |         |         | -0.641   | 0.745   |
|                                         | CD3E        |          |         |         | -0.631   | 0.672   |
| T cell subset markers                   | CDSA        |          |         |         |          | 0.766   |
|                                         | TBX21       | 0.824 *  | 0.795   | 0.875   | 0.605    | 0.885   |
|                                         | IFNG        | 0.909    |         |         | 0.970    | 1.201   |
|                                         | IL15        |          | -1.181  | 2.394   | 19.063   | 20.845  |
| Th1 associated genes                    | IL2         |          | -0.601  |         |          |         |
|                                         | CXCL10      |          |         |         | 1.197    | -0.754  |
|                                         | TNF         |          |         |         |          | -0.721  |
| Th17 associated genes                   | RORC        | 0.856    | 0.642   |         |          |         |
|                                         | IL22RA1     | 9.355    | 19.939  | -1.672  | 1.617    | 20.063  |
| Th2 associated genes                    | IL4         | 1.350    |         | 1.012   |          |         |
|                                         | IL6         | 2.341    | 1.460   |         |          | -0.716  |
|                                         | IL10        |          | -0.710  | -0.778  |          |         |
| Th9 associated genes                    | IL9         | -18.252  |         | 19.675  |          | 9.880   |
|                                         | IL9         | -6.493   | -2.169  | -1.876  | -1.185   | -9.884  |
| Transcriptional regulators / activators | TFEB        | 0.293    |         |         |          | -0.698  |
|                                         | FIV7        | 1.060    |         |         |          | -0.919  |
|                                         | BATF2       |          |         |         |          | -0.698  |
| Treg associated genes                   | LAG3        |          | 0.679   |         |          |         |
|                                         | FOXP3       |          |         |         |          | 0.652   |

**B)**

| Module                        | Gene     | D98      | D140      | D154     | D182     | D238     |
|-------------------------------|----------|----------|-----------|----------|----------|----------|
| Anti-microbial activity       | LTB      |          |           |          |          | -0.724   |
|                               | TNFRSF1A | 0.870    | 0.685     |          | 0.724    |          |
| Apoptosis / survival          | BCL2     |          |           | 0.761    |          | 1.134 *  |
|                               | FASLG    |          |           |          | 0.631    | 0.612    |
| B cell markers                | CD27     | -0.768   |           |          |          | 0.909    |
|                               | IGHD     | -0.687   |           |          |          | -0.977   |
|                               | MSA11    | 0.952    |           | 0.617    |          | 0.621    |
|                               | VEGFA    | 0.715 ** | 0.513 *** |          |          | 0.741    |
| Cell growth / proliferation   | AREG     | 0.782    |           | 0.939    | 1.030    |          |
|                               | BMP6     | -0.737   |           |          |          | 0.773    |
|                               | EGF      | -0.630   |           |          |          |          |
|                               | TGFB2    | 0.867    |           |          |          |          |
|                               | CCL23    | 0.929    | 2.092     | 1.407    | 1.419    |          |
| Chemokines                    | CCL19    |          |           | 0.601    | 11.381 * |          |
|                               | CXCL1    |          |           |          | 10.935   | 18.414   |
|                               | CXCL8    |          | 0.660     |          |          |          |
|                               | CXCL9    |          |           |          |          | 0.762    |
| Complement                    | C1QA     |          | 0.988     |          |          |          |
|                               | C1QB     |          | 0.925     | 1.156    |          |          |
|                               | C1QC     |          |           |          | 0.832    |          |
| Cytoskeleton associated gene  | MAP7D3   |          | 0.629     |          |          | -0.624   |
|                               | SEPT14   |          |           | 0.736    |          | 0.618    |
| Cytotoxicity markers          | GZMA     |          | 0.676     | 0.605    | 0.662    | 1.315    |
|                               | GZMB     | -4.000   | 1.285     | 0.817    | 0.798    | 1.344    |
| E3 ubiquitin protein ligases  | NEDD4L   | 1.061 *  | 1.421     |          |          | 0.938    |
|                               | ANKRD22  |          |           | 0.750    |          | -2.417 * |
| IFN signaling genes           | CD274    |          | 0.761     |          |          | -0.802   |
|                               | GBP1     | 0.743 *  |           |          | 0.600    | -1.145   |
|                               | GBP2     | 0.253 *  |           |          |          |          |
|                               | GBP4     |          |           |          | -1.482   | -2.533   |
|                               | GBP5     |          |           |          |          | -0.690   |
|                               | IDO1     | 0.716    | 1.261     |          | 0.615    |          |
|                               | IFI4     | 0.767    | -0.855    |          |          | -1.237   |
|                               | IFI44L   |          |           |          | 0.736    | -1.493   |
|                               | IFI6     |          | -0.733    | 0.948    |          | -1.126   |
|                               | IFIH1    | 0.354 *  |           |          |          |          |
|                               | IFIT2    | 0.602    |           |          |          | 1.018    |
|                               | IFIT3    |          |           |          |          | 1.664    |
|                               | IFITM1   |          | -0.838    |          |          |          |
|                               | IFITM3   |          |           |          |          | 0.804    |
|                               | IRF7     | 1.397 *  |           | -1.247   |          | -1.169   |
| OAS3                          | 0.661    |          |           | 0.823 ** | -1.131   |          |
| SOC1                          |          | 9.429    | -8.888    | 5.345    | -19.904  |          |
| STAT1                         | 0.420 *  |          |           |          | -0.649   |          |
| STAT2                         |          |          |           |          | -0.652   |          |
| TAP1                          | 0.593 *  |          |           |          | -0.725   |          |
| TRAFD1                        | 0.525 ** |          |           | -0.615   |          |          |
| SERPINC1                      |          | -0.761   | -1.123    | 0.666    | -0.942   |          |
| Inflammasome components       | NLRP4    | 0.618    |           |          |          |          |
|                               | NLRP11   | 19.096   | 19.994    | 17.905   | 19.022   | 19.104   |
|                               | NLRP12   | 0.729    |           |          |          | -1.338   |
|                               | NLRP2    | 1.048    | 1.115     | 1.093    | 0.970    |          |
|                               | NLRP4    | -0.708   | -22.072 * | -1.420   | -1.195   | 11.379   |
|                               | NLRP6    | 0.665    |           |          |          |          |
| Inflammation                  | NLRP7    | 0.607    | 1.122     |          |          | 1.014    |
|                               | DSE      |          |           |          | -0.642   |          |
|                               | IRAK3    | 0.752    |           |          |          | -0.926   |
|                               | MAP4K4   |          |           |          | -0.753   |          |
| Intracellular transport       | MMP9     | 0.637    |           |          |          | -0.745   |
|                               | TIFA     |          |           |          |          | -0.605   |
|                               | TIMP2    |          |           |          |          |          |
| Metabolism                    | SEC14L1  | 0.816    | 0.606     |          | 0.646    |          |
|                               | UCP2     | 0.607 *  |           |          |          | -0.666   |
| Myeloid associated genes      | CCL2     |          |           | 1.551    | 1.585 *  |          |
|                               | CCL22    |          | 1.241     |          |          |          |
|                               | CCL3     |          | 0.774 *   |          | -0.632   | 1.079 ** |
|                               | CD14     | -0.756   |           |          |          | 8.506    |
|                               | CXCL13   |          |           |          |          |          |
|                               | ICAM1    |          | 0.431 *   |          |          | 10.666   |
| NK cell markers               | IL12B    | -3.088   |           |          |          | 0.799    |
|                               | FCGR3A   |          |           | 0.725    | 0.698    | 0.914    |
|                               | KLRB1    |          |           | 0.902 *  | 1.095 *  | 0.659    |
|                               | KLRK1    |          |           |          | 0.948    | 1.851    |
|                               | KLRK2_3  |          |           |          | -1.056   |          |
|                               | KLRD1    |          |           | 0.786    |          | -1.011   |
|                               | KLRD1    |          |           |          |          | 0.839    |
|                               | NCAM1    |          | 0.711     |          |          |          |
| Pattern recognition receptors | CD209    |          | 0.664     |          | 0.691    | -1.061   |
|                               | CLECTA   |          |           |          |          | -0.682   |
|                               | MIR1     | 1.687    |           |          |          | -0.668   |
|                               | MIR2     | 0.847    | 0.654     |          |          |          |
|                               | NOD1     |          |           |          | -0.658   |          |
|                               | NOD2     |          |           |          |          | -0.937   |
|                               | TLR10    |          |           |          |          | 0.759    |
|                               | TLR2     | 1.175    |           |          |          | -0.778   |
| Prostanoids                   | TLR3     | 1.255 *  |           | 0.602    |          |          |
|                               | TLR4     | 0.756    |           |          |          | -0.943   |
|                               | TLR6     | 1.524    |           |          |          |          |
|                               | TLR9     |          |           |          | -0.789   |          |
| Scavenger receptors           | ILSRA    | 1.683    | 1.489     | 0.930    | 0.856    |          |
|                               | MARCO    | 0.718    |           |          |          |          |
| Small GTPases / (rho) GTPase  | RAB13    |          |           | 0.606    |          |          |
|                               | RAB24    | 0.471 *  |           |          |          | -0.757   |
|                               | RAB33A   | 0.897 *  |           |          |          |          |
|                               | TBC1D7   | 1.476 *  |           |          |          |          |
| T cell subset markers         | AIRE     | -0.663   |           | 0.950    |          | 0.881    |
|                               | CCR7     |          |           |          |          | -0.752   |
|                               | CD3E     |          |           |          |          | 0.910    |
|                               | CDBA     |          |           |          |          | -0.701   |
| Th1 associated genes          | IL7R     | 0.850    |           |          |          | 0.723    |
|                               | CX       |          |           |          |          |          |

**Figure 2.- Principal Component Analysis of the expression of 183 pre-selected genes in H56:IC31 vaccinated patients at days 84, 98, 140, 154, 182, and 238.**

We use PCA to project gene expression datasets of H56:IC31 vaccinated TB patients onto the first two components. Three H56:IC31 subgroups of patients are analysed: Non-Responders (NR) in purple, Responders (R) in orange and Partial Responders (PR) in green. The contribution of the first two principal components is given in brackets.

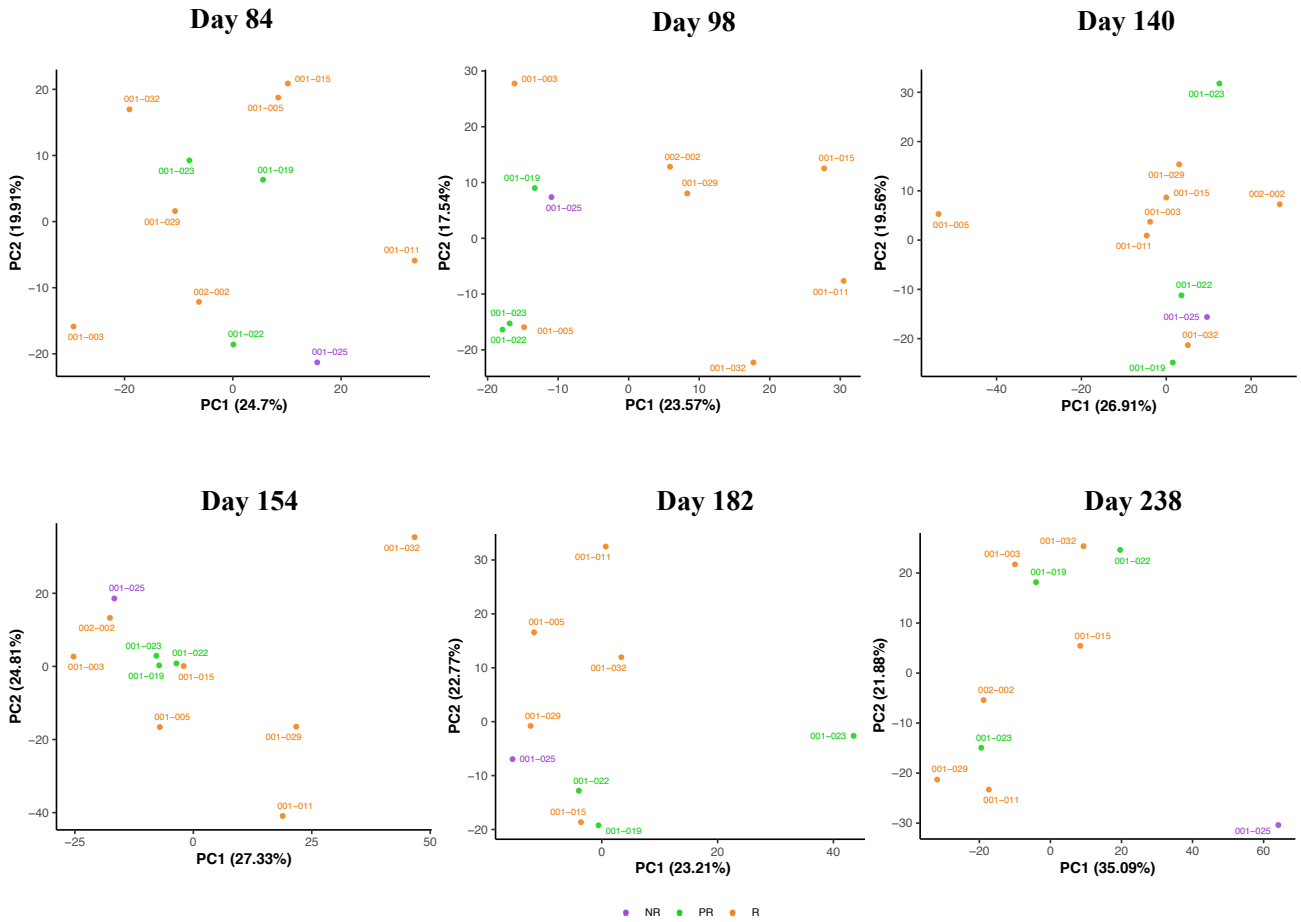

**Figure 3.- Heatmap and hierarchical clustering analysis of normalized Ct values in the H56:IC31 group at A) day 84; and, B) day 98.** A colour scale represent lower gene expression in blue and higher gene expression in red. Rows were centered. Both rows and columns are clustered using correlation distance and average linkage.





**Figure 4.- Evolution of the ACS-COR signature within the H56:IC31 group and Controls.** ACS-COR genes expression levels are represented as Log2FC respect the expression levels at day 0 in the H65:IC31 group (A) and Control group (B). A colour scale shows levels of upregulation (red) and downregulation (blue) at days 84, 98, 140, 154, 182 and 238, respect day 0. Blue and Red bars visually represent down and upregulated genes at the mentioned time points.

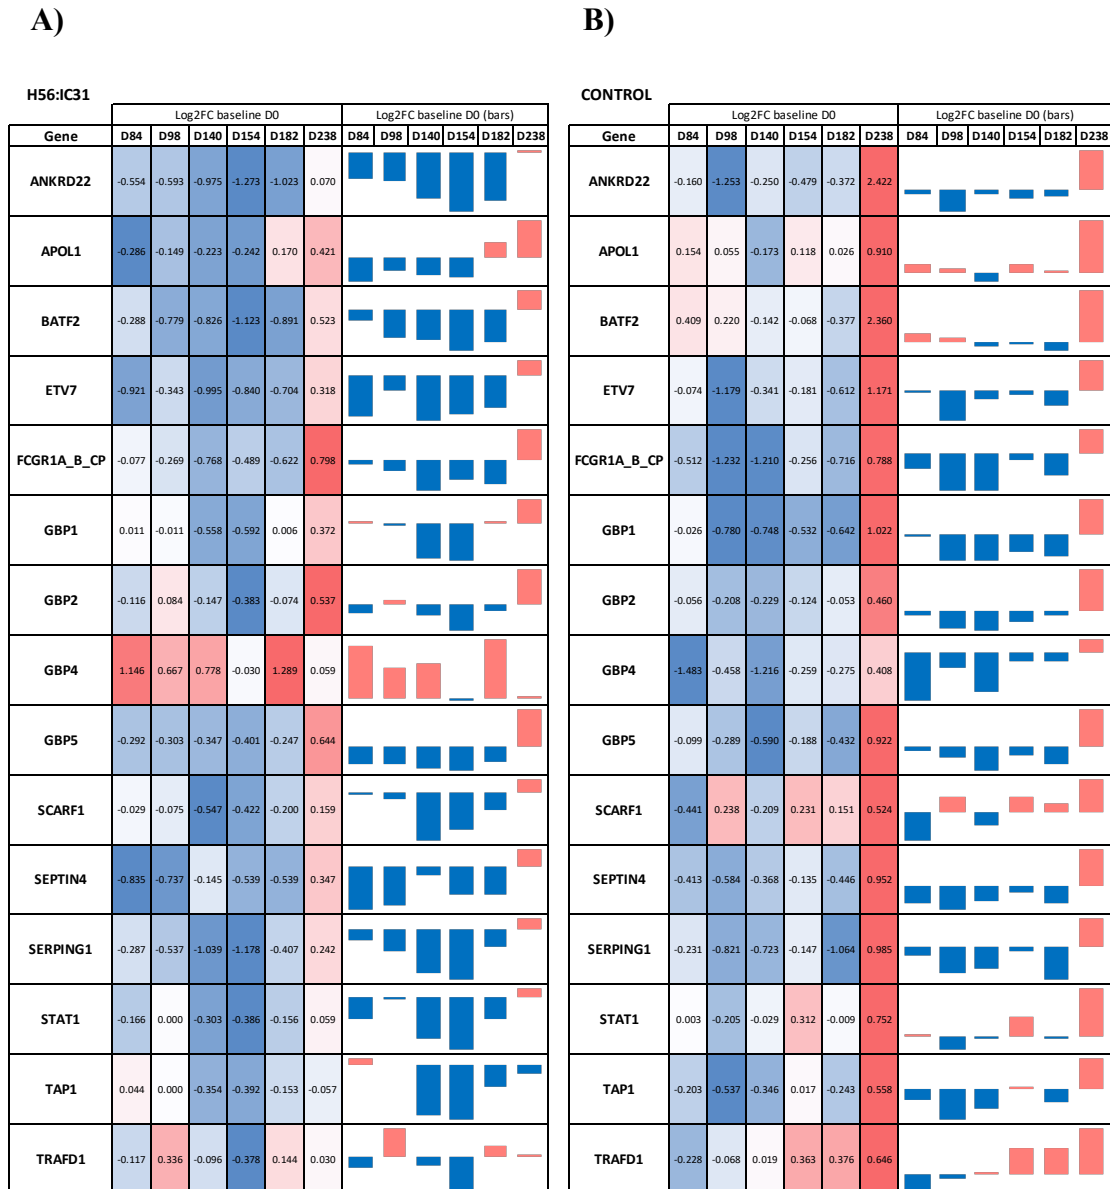

Supplement: Presentation_1.pdf [file Presentation_1.pdf]
